# Supplementary material
Source: Springer Nature journal article supplement (https://www.springermedizin.de/resource/supplementary/13601_2014_1068_MOESM2_ESM.pdf/9678628)

**a****Challenges**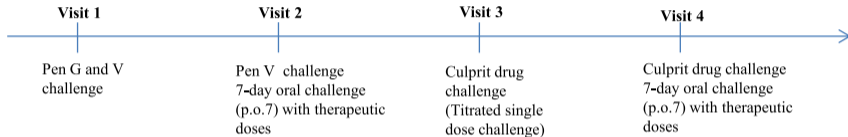**b****Specific IgE measurements**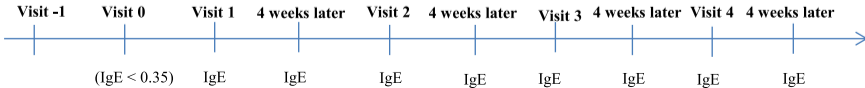

Supplement: MOESM2 [file 9678628]
